# Supplementary material for: Obesity and the risk of primary liver cancer: A systematic review and meta-analysis
Source: PubMed Central journal article supplement — Clin Mol Hepatol. 2020 Nov 26;27(1):157–74. doi: 10.3350/cmh.2020.0176 (PMC7820201; doi:10.3350/cmh.2020.0176), 2020-11-26
Supplement: cmh-2020-0176-suppl2.pdf [file cmh-2020-0176-suppl2.pdf]

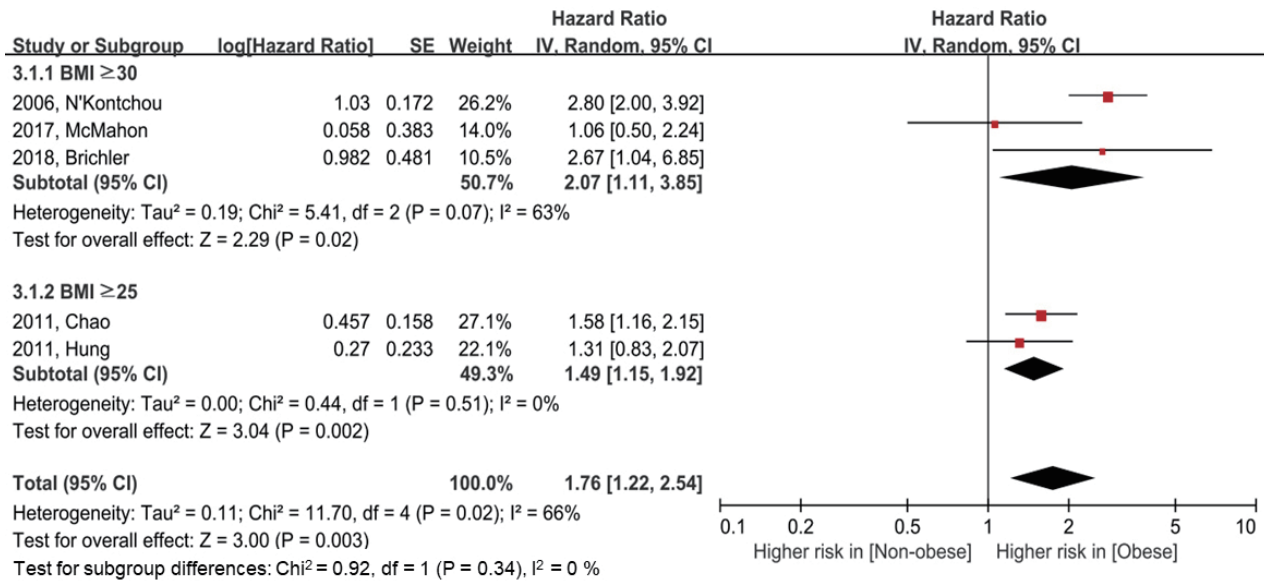

**A**

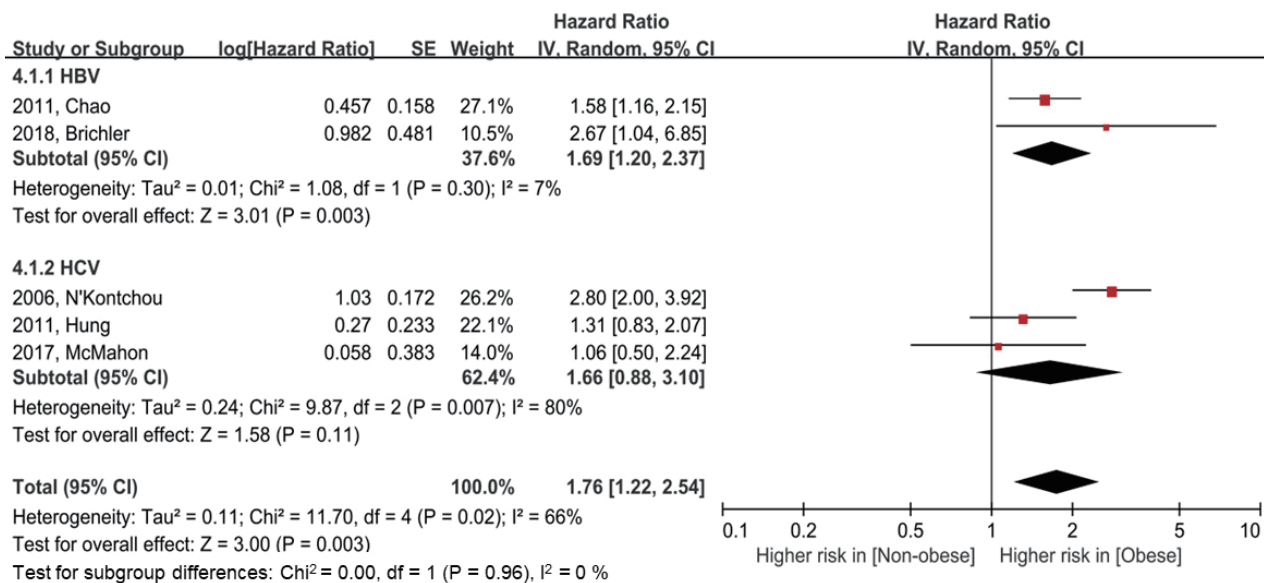

**B**

**Supplementary Figure 1.** Forest plots of the studies analyzing the occurrence of primary liver cancer in high risk population (hepatitis B infection or hepatitis C infection) according to BMI (A) and etiology (B). SE, standard error; CI, confidence interval; BMI, body mass index.
