# Supplementary material for: Obesity and the risk of primary liver cancer: A systematic review and meta-analysis
Source: PubMed Central journal article supplement — Clin Mol Hepatol. 2020 Nov 26;27(1):157–74. doi: 10.3350/cmh.2020.0176 (PMC7820201; doi:10.3350/cmh.2020.0176), 2020-11-26
Supplement: cmh-2020-0176-suppl3.pdf [file cmh-2020-0176-suppl3.pdf]

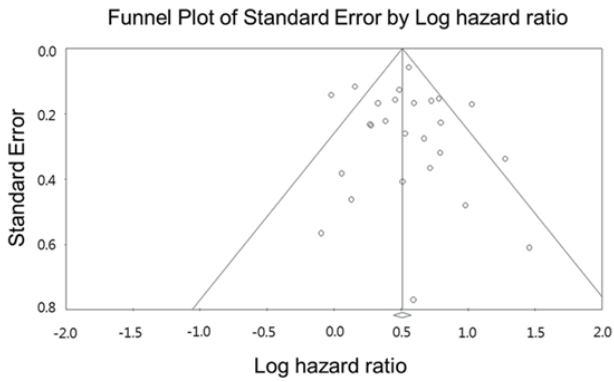

Egger's regression intercept

|                            |          |
|----------------------------|----------|
| Intercept                  | 0.24857  |
| Standard error             | 0.54482  |
| 95% lower limit (2-tailed) | -0.87588 |
| 95% upper limit (2-tailed) | 1.37303  |
| t-value                    | 0.45624  |
| df                         | 24.00000 |
| P-value (1-tailed)         | 0.32616  |
| P-value (2-tailed)         | 0.65232  |

**A**

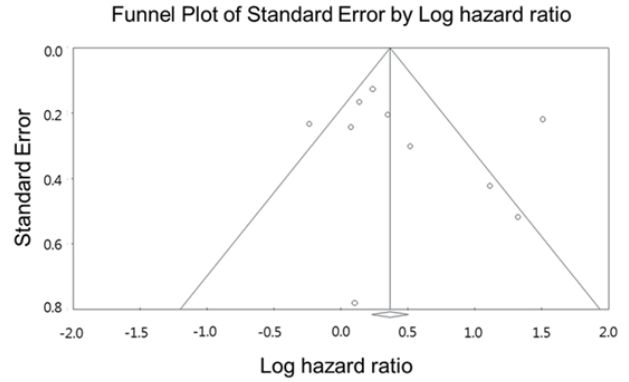

Egger's regression intercept

|                            |          |
|----------------------------|----------|
| Intercept                  | 1.54962  |
| Standard error             | 1.70421  |
| 95% lower limit (2-tailed) | -2.38029 |
| 95% upper limit (2-tailed) | 5.47953  |
| t-value                    | 0.90929  |
| df                         | 8.00000  |
| P-value (1-tailed)         | 0.19488  |
| P-value (2-tailed)         | 0.38977  |

**B**

**Supplementary Figure 2.** Funnel plots of all the studies analyzing the occurrence (A) and mortality (B) from primary liver cancer in whole population.
