# Supplementary material for: Obesity and the risk of primary liver cancer: A systematic review and meta-analysis
Source: PubMed Central journal article supplement — Clin Mol Hepatol. 2020 Nov 26;27(1):157–74. doi: 10.3350/cmh.2020.0176 (PMC7820201; doi:10.3350/cmh.2020.0176), 2020-11-26
Supplement: cmh-2020-0176-suppl4.pdf [file cmh-2020-0176-suppl4.pdf]

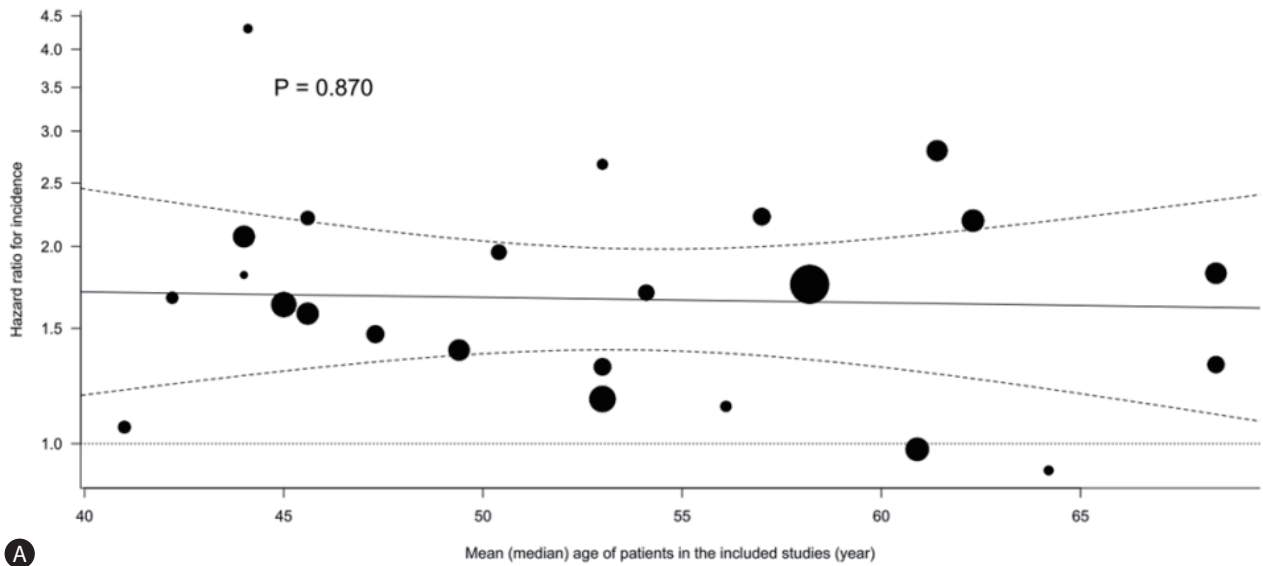

A

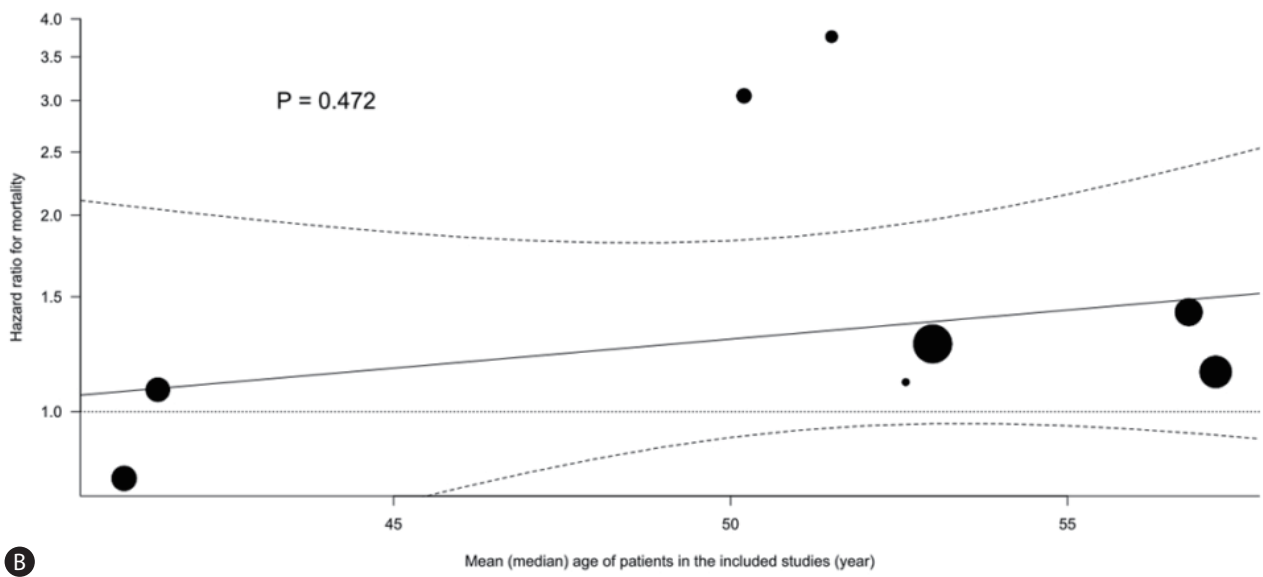

B

**Supplementary Figure 3.** Meta-regression analysis for the risk of primary liver cancer occurrence (A) and mortality (B) according to the mean age of the included studies. Size of black circles indicates the weight of the included studies. Solid line and dotted curves represent the regression line and the 95% confidence interval, respectively.
