# Supplementary material for: Obesity and the risk of primary liver cancer: A systematic review and meta-analysis
Source: PubMed Central journal article supplement — Clin Mol Hepatol. 2020 Nov 26;27(1):157–74. doi: 10.3350/cmh.2020.0176 (PMC7820201; doi:10.3350/cmh.2020.0176), 2020-11-26
Supplement: cmh-2020-0176-suppl6.pdf [file cmh-2020-0176-suppl6.pdf]

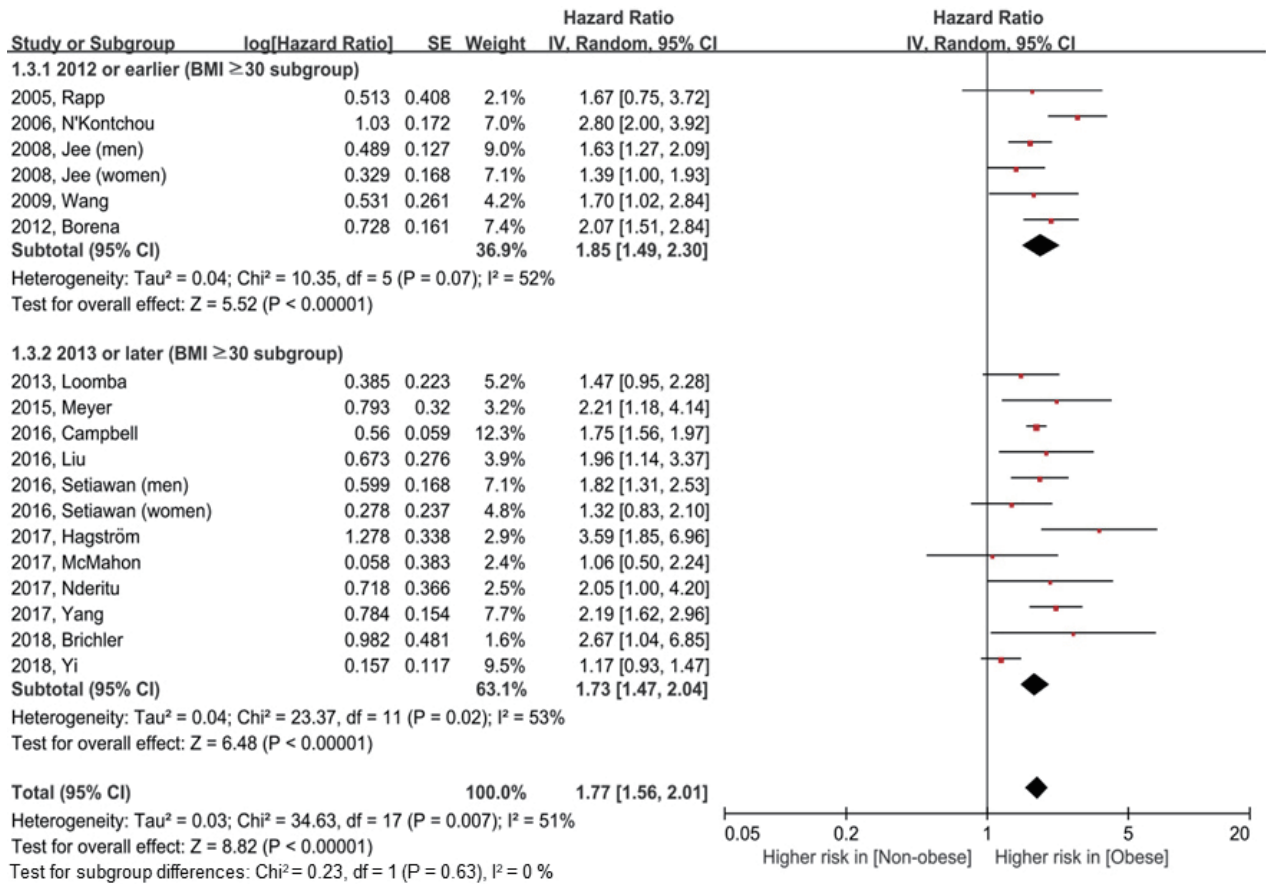

**A**

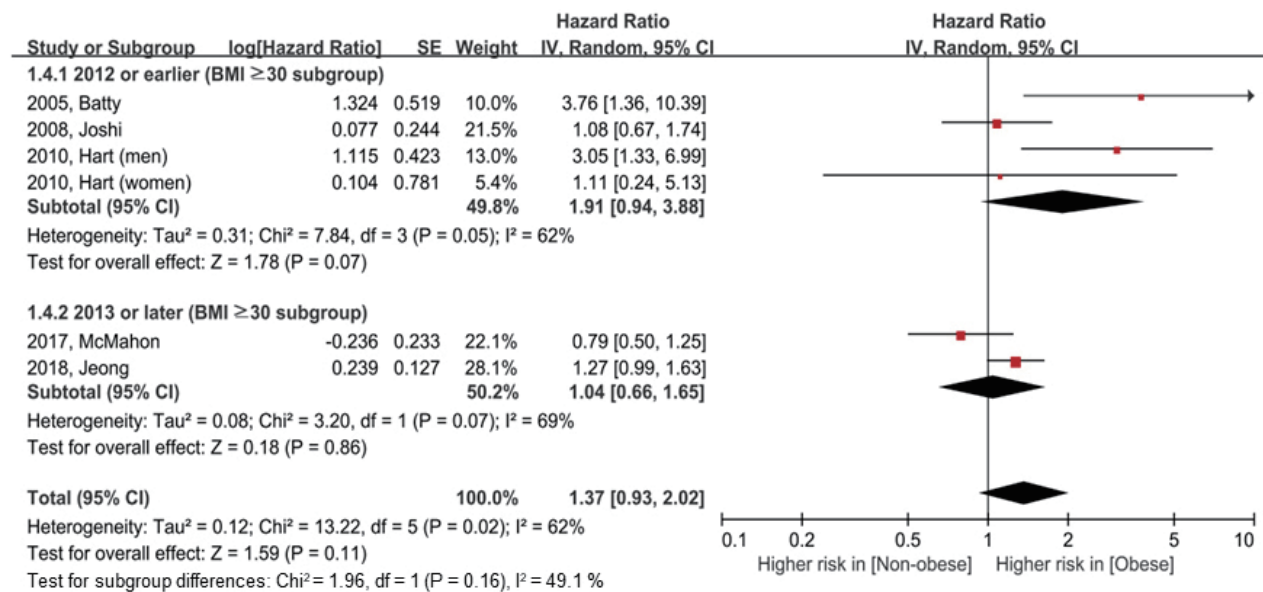

**B**

**Supplementary Figure 5.** Forest plots of the studies analyzing the occurrence (A) and cancer-related mortality (B) from primary liver cancer according to the publication year (before 2012/after 2012). SE, standard error; CI, confidence interval; BMI, body mass index.
